# Supplementary material
Source: PubMed Central journal article supplement (PMC2810957)
Supplement: NIHMS151182-supplement-1_si_001.pdf [file NIHMS151182-supplement-1_si_001.pdf]

# Electrically Conductive and Optically Active Porous Silicon Nanowires

*Yongquan Qu,<sup>†</sup> Lei Liao,<sup>†</sup> Yujing Li,<sup>‡</sup> Hua Zhang,<sup>‡</sup> Yu Huang,<sup>‡§</sup> Xiangfeng Duan<sup>†§\*</sup>*

<sup>†</sup>Department of Chemistry and Biochemistry, <sup>‡</sup>Department of Materials Science and Engineering,

<sup>§</sup>California Nanosystems Institute, University of California, Los Angeles, CA 90095

## Supplementary Information

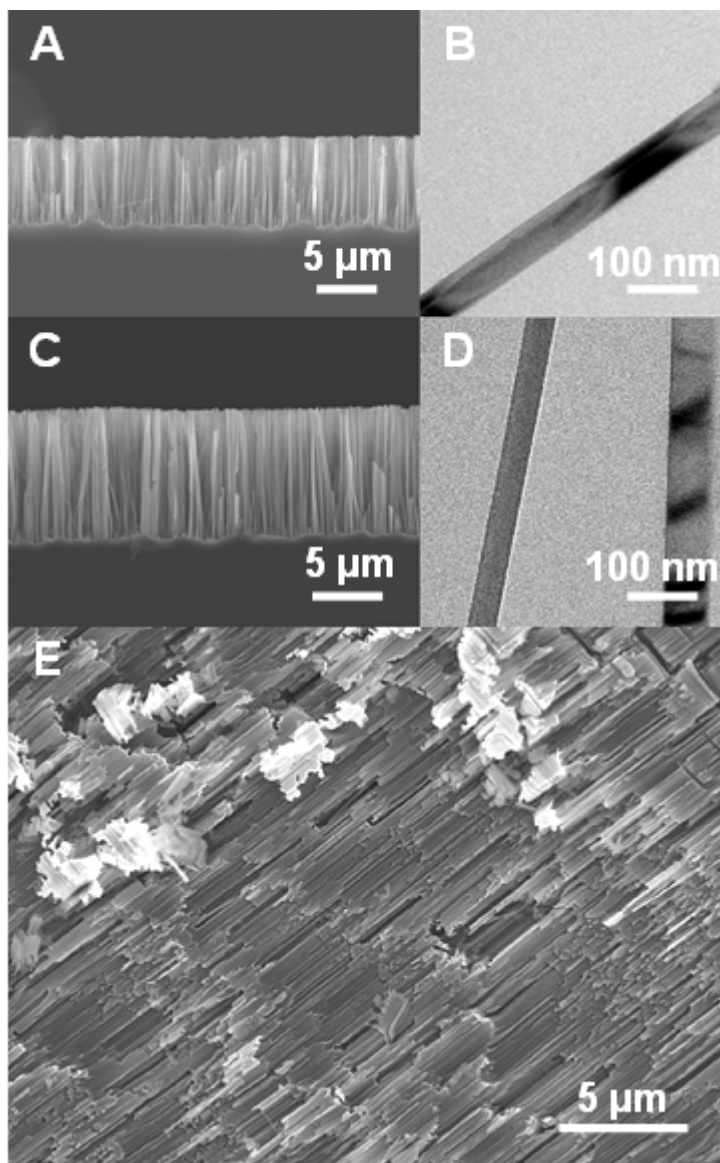

**Figure S1.** (A) Cross section SEM image of the silicon nanowire array obtained by one-step etching n-Si (100) wafer with 1-5  $\Omega$ -cm resistivity in a solution containing 5 M HF and 0.02 M AgNO<sub>3</sub> for 2 hours; (B) TEM image of the as-grown silicon nanowire in (A); (C) Cross section SEM image of the silicon nanowire array obtained by one-step etching n-Si (100) wafer with 0.3-0.8  $\Omega$ -cm resistivity in a solution containing 5 M HF and 0.02 M AgNO<sub>3</sub> for 2 hours; (D) TEM image of the as-grown silicon nanowire in (C); (E) SEM image of n-Si (100) wafer with 0.008-0.02  $\Omega$ -cm resistivity after etching in a solution containing 5 M HF and 0.02 M AgNO<sub>3</sub> for 2 hours.

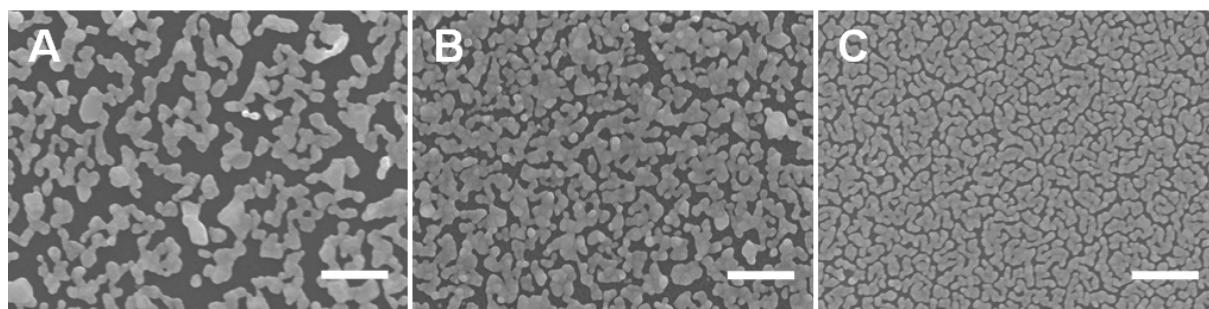

**Figure S2.** SEM images of as-deposited Ag on silicon pieces with deposition solution of 4.8 M HF and 0.005 M AgNO<sub>3</sub> for 1 min. (A) Silicon piece with 1-5  $\Omega$ -cm resistivity; (B) Silicon piece with 0.3-0.8  $\Omega$ -cm resistivity; and (C) Silicon piece with 0.008-0.02  $\Omega$ -cm resistivity. The scale bar is 500 nm. These studies show an increasing number of Ag nanoparticles on surface with increasing doping concentration.
